# Supplementary material for: Acidichromism and chiroptical switch based on the self-assembly of a cyanine dye on the PLGA/PAH LbL film
Source: Royal Society of Chemistry journal article supplement (doi:10.1039/b817782a), 2009-01-01
Supplement: b817782a.pdf [file b817782a.pdf]

## Supporting information for Acidochromism and Chiroptical Switch based on the Self-Assembly of a Cyanine dye on the PLGA/PAH LbL film

Guocheng Zhang and Minghua Liu\*

<sup>a</sup> Beijing National Laboratory for Molecular Science (BNLMS), CAS Key Laboratory of Colloid, Interface, and Chemical Thermodynamics, Institute of Chemistry, Chinese Academy of Sciences Beijing, 100080, P. R. China

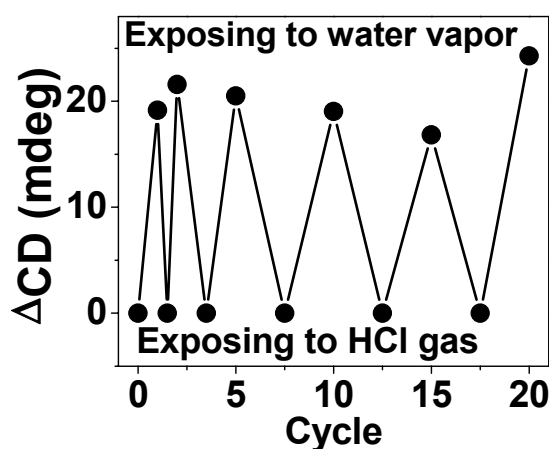

Figure S1 Plot of CD intensity against the number of HCl/water vapor cycles.

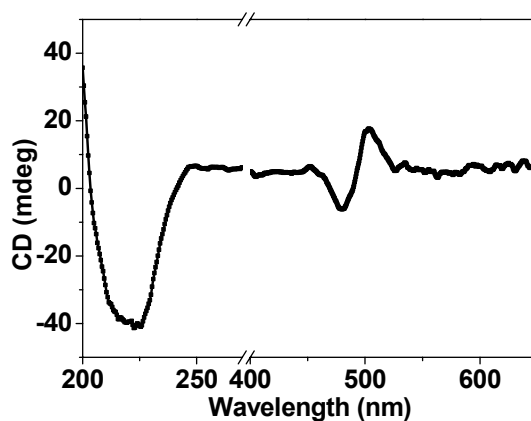

Figure S2 CD spectra of PLGA/PAH/SeCy (1mM) complex film after the treatment of HCl gas and vapor.
